# Supplementary material for: Expert Perspectives on Controversies in Metastatic Castration-Resistant Prostate Cancer Management: Narrative Review and Report of the First US Prostate Cancer Conference Part 2
Source: PubMed Central journal article supplement — JU Open Plus. Author manuscript; Available in PMC 2024 May 21. (PMC11107999; doi:10.1097/ju9.0000000000000138), 2024-04-15
Supplement: NIHMS1990829-supplement-Supplement.pdf [file NIHMS1990829-supplement-Supplement.pdf]

**Supplemental Appendix 1.** Questions and Expert Responses (N=38) From USPC Sessions on mCRPC and Aggressive Variant/Neuroendocrine Prostate Cancer

**6. Aggressive Variant/Neuroendocrine Prostate Cancer**

| <b>6.1</b> Do you use platinum-based chemotherapy for patients with mCRPC in the absence of DNA repair gene alterations? |          |          |
|--------------------------------------------------------------------------------------------------------------------------|----------|----------|
| <b>Answer</b>                                                                                                            | <b>#</b> | <b>%</b> |
| Yes                                                                                                                      | 18       | 50       |
| No                                                                                                                       | 11       | 31       |
| Abstain                                                                                                                  | 7        | 19       |

| <b>6.2</b> Do you use histologic features to select patients for platinum-based chemotherapy? |          |          |
|-----------------------------------------------------------------------------------------------|----------|----------|
| <b>Answer</b>                                                                                 | <b>#</b> | <b>%</b> |
| Yes                                                                                           | 31       | 86       |
| No                                                                                            | 2        | 6        |
| Abstain                                                                                       | 3        | 8        |

| <b>6.3</b> Which histologic features do you use to select patients for platinum-based chemotherapy? |          |          |
|-----------------------------------------------------------------------------------------------------|----------|----------|
| <b>Answer</b>                                                                                       | <b>#</b> | <b>%</b> |
| Small-cell carcinoma                                                                                | 7        | 19       |
| Small-cell carcinoma or any features of neuroendocrine prostate cancer (NEPC) on biopsy             | 23       | 64       |
| Other histologic features                                                                           | 0        | 0        |
| I do not use histologic features to select patients for platinum-based chemotherapy                 | 1        | 3        |
| Abstain                                                                                             | 5        | 14       |

| <b>6.4</b> Do you use the clinical features listed below to select platinum-based chemotherapy for patients with CRPC (1st or 2nd line CRPC) for whom biopsy does not show small-cell carcinoma or NEPC? |            |          |           |          |                |          |
|----------------------------------------------------------------------------------------------------------------------------------------------------------------------------------------------------------|------------|----------|-----------|----------|----------------|----------|
| <b>Answer</b>                                                                                                                                                                                            | <b>Yes</b> |          | <b>No</b> |          | <b>Abstain</b> |          |
|                                                                                                                                                                                                          | <b>#</b>   | <b>%</b> | <b>#</b>  | <b>%</b> | <b>#</b>       | <b>%</b> |
| Liver metastases                                                                                                                                                                                         | 26         | 72.2     | 5         | 13.9     | 5              | 13.9     |
| Low PSA $\leq$ 10 ng/mL plus $\geq$ 20 bone metastases on initial presentation or CRPC progression                                                                                                       | 15         | 41.7     | 14        | 38.9     | 7              | 19.4     |
| Radiographic progression with PSA $\leq$ 1 ng/mL                                                                                                                                                         | 23         | 63.9     | 10        | 27.8     | 3              | 8.3      |
| Lytic bone metastases                                                                                                                                                                                    | 22         | 61.1     | 11        | 30.6     | 3              | 8.3      |
| Elevated serum neuroendocrine markers (eg, CEA, LDH)                                                                                                                                                     | 15         | 41.7     | 14        | 38.9     | 7              | 19.4     |
| Bulky $\geq$ 5 cm lymphadenopathy or high-grade tumor mass in prostate/pelvis                                                                                                                            | 14         | 38.9     | 18        | 50       | 4              | 11.1     |
| Short response to initial AR therapy $\leq$ 6 months                                                                                                                                                     | 13         | 36.1     | 16        | 44.4     | 7              | 19.4     |

|                 |   |      |    |      |   |      |
|-----------------|---|------|----|------|---|------|
| Lung metastases | 8 | 22.2 | 21 | 58.3 | 7 | 19.4 |
|-----------------|---|------|----|------|---|------|

|                                                                                                                                                                                                     |          |          |
|-----------------------------------------------------------------------------------------------------------------------------------------------------------------------------------------------------|----------|----------|
| <b>6.5</b> Do you use genomic features (other than DNA repair aberrations) to select platinum-based chemotherapy for patients with CRPC when the biopsy does not show small-cell carcinoma or NEPC? |          |          |
| <b>Answer</b>                                                                                                                                                                                       | <b>#</b> | <b>%</b> |
| Yes                                                                                                                                                                                                 | 22       | 61       |
| No                                                                                                                                                                                                  | 9        | 25       |
| Abstain                                                                                                                                                                                             | 5        | 14       |

|                                                                                                                                                                                                           |          |          |
|-----------------------------------------------------------------------------------------------------------------------------------------------------------------------------------------------------------|----------|----------|
| <b>6.6</b> Which genomic features (other than DNA repair aberrations) do you use to select platinum-based chemotherapy for patients with CRPC when the biopsy does not show small-cell carcinoma or NEPC? |          |          |
| <b>Answer</b>                                                                                                                                                                                             | <b>#</b> | <b>%</b> |
| RB1 deletion or mutation                                                                                                                                                                                  | 2        | 6        |
| TP53 mutation or deletion                                                                                                                                                                                 | 1        | 3        |
| PTEN deletion                                                                                                                                                                                             | 1        | 3        |
| Concurrent RB1 and TP53 loss of function                                                                                                                                                                  | 4        | 11       |
| Loss of 2 of 3: RB1, TP53, PTEN                                                                                                                                                                           | 12       | 33       |
| I do not use genomic features to select patients for platinum-based chemotherapy                                                                                                                          | 9        | 25       |
| Abstain                                                                                                                                                                                                   | 7        | 19       |

|                                                                                                                       |            |          |           |          |                |          |
|-----------------------------------------------------------------------------------------------------------------------|------------|----------|-----------|----------|----------------|----------|
| <b>6.7</b> In which of the following situations do you consider doing a biopsy to look for small-cell carcinoma/NEPC? |            |          |           |          |                |          |
| <b>Answer</b>                                                                                                         | <b>Yes</b> |          | <b>No</b> |          | <b>Abstain</b> |          |
|                                                                                                                       | <b>#</b>   | <b>%</b> | <b>#</b>  | <b>%</b> | <b>#</b>       | <b>%</b> |
| When the development of new liver metastases in setting of low or nonrising PSA occurs?                               | 35         | 97.2     | 0         | 0        | 1              | 2.8      |
| In the case of PSMA-negative soft tissue or visceral lesions on PSMA-PET/CT?                                          | 30         | 83.3     | 3         | 8.3      | 3              | 8.3      |
| When the development of parenchymal brain metastases occurs?                                                          | 22         | 61.1     | 8         | 22.2     | 6              | 16.7     |
| For any patient with CRPC?                                                                                            | 6          | 16.7     | 26        | 72.2     | 4              | 11.1     |

|                                                                                                                                           |          |          |
|-------------------------------------------------------------------------------------------------------------------------------------------|----------|----------|
| <b>6.8</b> If small-cell carcinoma/NEPC is suspected, what is the <b>minimum</b> evaluation(s) of metastatic biopsies you would complete? |          |          |
| <b>Answer</b>                                                                                                                             | <b>#</b> | <b>%</b> |
| Only morphology is required (eg, small cell, large cell, mixed, adenocarcinoma, poorly differentiated)                                    | 0        | 0        |
| Morphology plus immunohistochemistry (IHC) for classical NE markers (eg, SYP, chromogranin, INSM1)                                        | 10       | 28       |
| Morphology plus IHC for PSA and AR                                                                                                        | 6        | 17       |
| All of the above                                                                                                                          | 19       | 53       |
| Abstain                                                                                                                                   | 1        | 3        |

|                                                                                                                                                        |          |          |
|--------------------------------------------------------------------------------------------------------------------------------------------------------|----------|----------|
| <b>6.9</b> Do you recommend repeat genomic sequencing in a patient with small-cell/NEPC if they already had genomic sequencing of a prior CRPC biopsy? |          |          |
| <b>Answer</b>                                                                                                                                          | <b>#</b> | <b>%</b> |
| Yes                                                                                                                                                    | 26       | 72       |
| No                                                                                                                                                     | 7        | 19       |
| Abstain                                                                                                                                                | 3        | 8        |

|                                                                                                                                                                                                                                                                                                                                                                                             |          |          |
|---------------------------------------------------------------------------------------------------------------------------------------------------------------------------------------------------------------------------------------------------------------------------------------------------------------------------------------------------------------------------------------------|----------|----------|
| <b>6.10</b> A 69-year-old patient with mCRPC has progression after abiraterone, docetaxel, and cabazitaxel and has undergone a PSMA-PET/CT for consideration of treatment with <sup>177</sup> Lu-PSMA-617. His PSA has risen 5 ng/mL to > 9 ng/mL and multiple new PSMA-negative liver metastases are identified, in addition to new PSMA-positive bone metastases. What would you do next? |          |          |
| <b>Answer</b>                                                                                                                                                                                                                                                                                                                                                                               | <b>#</b> | <b>%</b> |
| FDG PET                                                                                                                                                                                                                                                                                                                                                                                     | 2        | 6        |
| FDG PET and a biopsy of the liver lesion                                                                                                                                                                                                                                                                                                                                                    | 11       | 31       |
| Biopsy of the liver lesion                                                                                                                                                                                                                                                                                                                                                                  | 15       | 42       |
| Analysis of circulating tumor DNA to look for RB1/TP53/PTEN alterations                                                                                                                                                                                                                                                                                                                     | 0        | 0        |
| <sup>177</sup> Lu-PSMA-617                                                                                                                                                                                                                                                                                                                                                                  | 1        | 3        |
| Platinum-based chemotherapy                                                                                                                                                                                                                                                                                                                                                                 | 4        | 11       |
| None of the above                                                                                                                                                                                                                                                                                                                                                                           | 0        | 0        |
| Abstain                                                                                                                                                                                                                                                                                                                                                                                     | 3        | 8        |

|                                                                                                                                                                                                                                                          |          |          |
|----------------------------------------------------------------------------------------------------------------------------------------------------------------------------------------------------------------------------------------------------------|----------|----------|
| <b>6.11</b> What is the preferred nomenclature for a patient with CRPC who develops new liver metastases with PSA < 1 ng/mL and has a liver biopsy that is read as poorly differentiated carcinoma with neuroendocrine features (by morphology and IHC)? |          |          |
| <b>Answer</b>                                                                                                                                                                                                                                            | <b>#</b> | <b>%</b> |
| Neuroendocrine prostate cancer                                                                                                                                                                                                                           | 5        | 14       |
| Small cell neuroendocrine prostate carcinoma (SCNPC)                                                                                                                                                                                                     | 7        | 19       |
| Aggressive variant prostate cancer (AVPC)                                                                                                                                                                                                                | 18       | 50       |
| AR-indifferent prostate cancer                                                                                                                                                                                                                           | 2        | 6        |
| CRPC                                                                                                                                                                                                                                                     | 1        | 3        |
| Not sure                                                                                                                                                                                                                                                 | 1        | 3        |
| Abstain                                                                                                                                                                                                                                                  | 2        | 6        |

|                                                                                                                                                                                                                                                                                                                                                                                                  |          |          |
|--------------------------------------------------------------------------------------------------------------------------------------------------------------------------------------------------------------------------------------------------------------------------------------------------------------------------------------------------------------------------------------------------|----------|----------|
| <b>6.12</b> Which of the following treatments would you use for a patient with CRPC and treatment-emergent small-cell carcinoma/NEPC after progression on ADT plus abiraterone followed by docetaxel with new liver metastases? Serum PSA is < 1 ng/mL. Liver biopsy shows pure small-cell carcinoma, AR-negative, PSA-negative by IHC. A TMPRSS2-ERG gene fusion is detected by DNA sequencing. |          |          |
| <b>Answer</b>                                                                                                                                                                                                                                                                                                                                                                                    | <b>#</b> | <b>%</b> |
| Carboplatin plus etoposide                                                                                                                                                                                                                                                                                                                                                                       | 7        | 19       |
| Carboplatin plus etoposide, plus atezolizumab, followed by atezolizumab maintenance                                                                                                                                                                                                                                                                                                              | 8        | 22       |
| Carboplatin plus cabazitaxel                                                                                                                                                                                                                                                                                                                                                                     | 9        | 25       |
| Cabazitaxel                                                                                                                                                                                                                                                                                                                                                                                      | 0        | 0        |
| Other                                                                                                                                                                                                                                                                                                                                                                                            | 1        | 3        |
| Abstain                                                                                                                                                                                                                                                                                                                                                                                          | 11       | 31       |

|                                                                                                                                                                                                                                                                                   |           |           |
|-----------------------------------------------------------------------------------------------------------------------------------------------------------------------------------------------------------------------------------------------------------------------------------|-----------|-----------|
| <b>6.13</b> What is preferred treatment for a patient with CRPC who develops new liver lesions and has a PSA < 1 ng/mL after progression on ADT plus abiraterone followed by docetaxel? A biopsy shows poorly differentiated adenocarcinoma that is AR-positive and PSA-negative. |           |           |
| <b>Answer</b>                                                                                                                                                                                                                                                                     | <b>#</b>  | <b>%</b>  |
| Carboplatin plus etoposide                                                                                                                                                                                                                                                        | 3         | 8         |
| Carboplatin plus etoposide and atezolizumab, followed by atezolizumab maintenance                                                                                                                                                                                                 | 2         | 6         |
| <b>Carboplatin plus cabazitaxel</b>                                                                                                                                                                                                                                               | <b>18</b> | <b>50</b> |
| Cabazitaxel                                                                                                                                                                                                                                                                       | 2         | 6         |
| PSMA PET and Lu-PSMA-617, if PSMA positive                                                                                                                                                                                                                                        | 3         | 8         |
| Other                                                                                                                                                                                                                                                                             |           |           |
| Abstain                                                                                                                                                                                                                                                                           | 8         | 22        |

|                                                                                                                                                                 |           |           |
|-----------------------------------------------------------------------------------------------------------------------------------------------------------------|-----------|-----------|
| <b>6.14</b> Do you recommend brain MRI for patients with treatment-emergent pure small-cell carcinoma/NEPC for staging in the absence of neurological symptoms? |           |           |
| <b>Answer</b>                                                                                                                                                   | <b>#</b>  | <b>%</b>  |
| <b>Yes</b>                                                                                                                                                      | <b>18</b> | <b>50</b> |
| No                                                                                                                                                              | 15        | 42        |
| Abstain                                                                                                                                                         | 3         | 8         |

|                                                                                                                                                                                                                                      |           |           |
|--------------------------------------------------------------------------------------------------------------------------------------------------------------------------------------------------------------------------------------|-----------|-----------|
| <b>6.15</b> Which of the following therapies would you use as the next line of therapy (off trial) for a fit patient with treatment emergent small-cell carcinoma/NEPC after progression on therapy with carboplatin plus etoposide? |           |           |
| <b>Answer</b>                                                                                                                                                                                                                        | <b>#</b>  | <b>%</b>  |
| Lurbinectedin                                                                                                                                                                                                                        | 6         | 17        |
| Pembrolizumab                                                                                                                                                                                                                        | 5         | 14        |
| Taxane                                                                                                                                                                                                                               | 5         | 14        |
| Other                                                                                                                                                                                                                                | 5         | 14        |
| Hospice                                                                                                                                                                                                                              | 1         | 3         |
| <b>Abstain</b>                                                                                                                                                                                                                       | <b>14</b> | <b>39</b> |

|                                                                                                                                                                                                                                                                          |           |           |
|--------------------------------------------------------------------------------------------------------------------------------------------------------------------------------------------------------------------------------------------------------------------------|-----------|-----------|
| <b>6.16</b> Which of the following treatments would you use as the next line of therapy (off trial) for a patient who has AVPC without features of small-cell carcinoma/NEPC after progression on therapy with carboplatin plus cabazitaxel and is PSMA-negative on PET? |           |           |
| <b>Answer</b>                                                                                                                                                                                                                                                            | <b>#</b>  | <b>%</b>  |
| Lurbinectedin                                                                                                                                                                                                                                                            | 5         | 14        |
| Pembrolizumab                                                                                                                                                                                                                                                            | 4         | 11        |
| Mitoxantrone                                                                                                                                                                                                                                                             | 1         | 3         |
| Other                                                                                                                                                                                                                                                                    | 8         | 22        |
| Hospice                                                                                                                                                                                                                                                                  | 3         | 8         |
| <b>Abstain</b>                                                                                                                                                                                                                                                           | <b>15</b> | <b>42</b> |

## 7. mCRPC (1 of 3)

|                                                                                                                                                                                  |           |           |
|----------------------------------------------------------------------------------------------------------------------------------------------------------------------------------|-----------|-----------|
| <b>7.1</b> Can further manipulation of the androgen receptor axis result in clinical meaningful benefit in patients who have received next-generation galeterone analogs (NGGA)? |           |           |
| <b>Answer</b>                                                                                                                                                                    | <b>#</b>  | <b>%</b>  |
| <b>Yes</b>                                                                                                                                                                       | <b>17</b> | <b>46</b> |

|          |    |    |
|----------|----|----|
| No       | 2  | 5  |
| Not sure | 12 | 32 |
| Abstain  | 6  | 16 |

|                                                                                                                                                                 |          |          |
|-----------------------------------------------------------------------------------------------------------------------------------------------------------------|----------|----------|
| <b>7.2 Does the use of docetaxel in mHSPC, but not mCRPC in the castration-sensitive state, mean that it should not be used in the hormone-sensitive state?</b> |          |          |
| <b>Answer</b>                                                                                                                                                   | <b>#</b> | <b>%</b> |
| No, I do not use docetaxel for mCRPC                                                                                                                            | 1        | 3        |
| Yes, I would docetaxel for mCRPC                                                                                                                                | 7        | 19       |
| Yes, I would use docetaxel for mCRPC, but only if PFS at least 12 months post docetaxel for mHSPC                                                               | 19       | 51       |
| Not sure                                                                                                                                                        | 2        | 5        |
| Abstain                                                                                                                                                         | 8        | 22       |

|                                                                                                                          |          |          |
|--------------------------------------------------------------------------------------------------------------------------|----------|----------|
| <b>7.3 Would you use ARIs for patients with mCRPC if they were previously used for the patients when they had mHSPC?</b> |          |          |
| <b>Answer</b>                                                                                                            | <b>#</b> | <b>%</b> |
| Yes                                                                                                                      | 26       | 70       |
| No                                                                                                                       | 8        | 22       |
| Abstain                                                                                                                  | 3        | 8        |

|                                                                                                                   |          |          |
|-------------------------------------------------------------------------------------------------------------------|----------|----------|
| <b>7.4 Do you believe that existing checkpoint inhibitors will ever demonstrate sufficient activity in mCRPC?</b> |          |          |
| <b>Answer</b>                                                                                                     | <b>#</b> | <b>%</b> |
| Yes                                                                                                               | 8        | 22       |
| No                                                                                                                | 13       | 35       |
| Not sure                                                                                                          | 15       | 41       |
| Abstain                                                                                                           | 1        | 3        |

|                                                                                      |          |          |
|--------------------------------------------------------------------------------------|----------|----------|
| <b>7.5 Where is the optimal place in the timeline of CRPC to test a novel agent?</b> |          |          |
| <b>Answer</b>                                                                        | <b>#</b> | <b>%</b> |
| After all approved therapies have been tried                                         | 2        | 5        |
| First-line mCRPC                                                                     | 12       | 32       |
| After at least 1 androgen receptor pathway inhibitors (ARPI) and a taxane            | 13       | 35       |
| After at least 1 ARPI, a taxane, and 177Lu-PSMA-617 (in eligible patients)           | 4        | 11       |
| Not sure                                                                             | 3        | 8        |
| Abstain                                                                              | 3        | 8        |

## 8. mCRPC—PARPis

|                                                                                                     |          |          |
|-----------------------------------------------------------------------------------------------------|----------|----------|
| <b>8.1 Should PARPi monotherapy be only offered to men with mCRPC who harbor BRCA1/2 mutations?</b> |          |          |
| <b>Answer</b>                                                                                       | <b>#</b> | <b>%</b> |
| Yes                                                                                                 | 17       | 46       |
| No                                                                                                  | 15       | 41       |
| Not sure                                                                                            | 2        | 5        |
| Abstain                                                                                             | 3        | 8        |

| <b>8.2 Should PARPi monotherapy be offered to men with mCRPC who have non-BRCA HRR gene mutations?</b> |          |          |
|--------------------------------------------------------------------------------------------------------|----------|----------|
| <b>Answer</b>                                                                                          | <b>#</b> | <b>%</b> |
| Yes                                                                                                    | 14       | 38       |
| No                                                                                                     | 14       | 38       |
| Not sure                                                                                               | 6        | 16       |
| Abstain                                                                                                | 3        | 8        |

| <b>8.3 Can ctDNA testing alone (without tissue testing) be used to identify and select men for treatment with a PARPi?</b> |          |          |
|----------------------------------------------------------------------------------------------------------------------------|----------|----------|
| <b>Answer</b>                                                                                                              | <b>#</b> | <b>%</b> |
| Yes                                                                                                                        | 22       | 59       |
| No                                                                                                                         | 4        | 11       |
| Not sure                                                                                                                   | 7        | 19       |
| Abstain                                                                                                                    | 4        | 11       |

| <b>8.4 Do you recommend rechallenge with another PARPi if the disease progresses on 1 PARPi?</b> |          |          |
|--------------------------------------------------------------------------------------------------|----------|----------|
| <b>Answer</b>                                                                                    | <b>#</b> | <b>%</b> |
| Yes                                                                                              | 2        | 5        |
| No                                                                                               | 25       | 68       |
| Not sure                                                                                         | 6        | 16       |
| Abstain                                                                                          | 4        | 11       |

| <b>8.5 In men with mCRPC with HRR gene alterations, should PARPi monotherapy be preferably offered before or after docetaxel?</b> |          |          |
|-----------------------------------------------------------------------------------------------------------------------------------|----------|----------|
| <b>Answer</b>                                                                                                                     | <b>#</b> | <b>%</b> |
| Before                                                                                                                            | 29       | 78       |
| After                                                                                                                             | 1        | 3        |
| Not sure                                                                                                                          | 5        | 14       |
| Abstain                                                                                                                           | 2        | 5        |

| <b>8.6 Given the potential of marrow toxicities, should there be a defined and fixed duration of treatment with PARPi in those men who continue to respond to PARPi beyond 1-2 years?</b> |          |          |
|-------------------------------------------------------------------------------------------------------------------------------------------------------------------------------------------|----------|----------|
| <b>Answer</b>                                                                                                                                                                             | <b>#</b> | <b>%</b> |
| Yes                                                                                                                                                                                       | 10       | 27       |
| No                                                                                                                                                                                        | 13       | 35       |
| Not sure                                                                                                                                                                                  | 11       | 30       |
| Abstain                                                                                                                                                                                   | 3        | 8        |

| <b>8.7 Would you consider intermittent PARPi therapy in patients who achieve a deep response to PARPi?</b> |          |          |
|------------------------------------------------------------------------------------------------------------|----------|----------|
| <b>Answer</b>                                                                                              | <b>#</b> | <b>%</b> |
| Yes                                                                                                        | 15       | 41       |
| No                                                                                                         | 5        | 14       |
| Not sure                                                                                                   | 15       | 41       |
| Abstain                                                                                                    | 2        | 5        |

| <b>8.8a</b> For men with BRCA altered mCRPC, would you offer PARPi + ARPi? |          |          |
|----------------------------------------------------------------------------|----------|----------|
| <b>Answer</b>                                                              | <b>#</b> | <b>%</b> |
| Yes                                                                        | 31       | 84       |
| No                                                                         | 0        | 0        |
| Not sure                                                                   | 2        | 5        |
| Abstain                                                                    | 4        | 11       |

| <b>8.8b</b> If toxicities lead to discontinuation of a PARPi (without disease progression on the first PARPi), do you feel treatment with another PARPi with nonoverlapping toxicities should be offered? |          |          |
|-----------------------------------------------------------------------------------------------------------------------------------------------------------------------------------------------------------|----------|----------|
| <b>Answer</b>                                                                                                                                                                                             | <b>#</b> | <b>%</b> |
| Yes                                                                                                                                                                                                       | 20       | 54       |
| No                                                                                                                                                                                                        | 5        | 14       |
| Not sure                                                                                                                                                                                                  | 10       | 27       |
| Abstain                                                                                                                                                                                                   | 2        | 5        |

| <b>8.9</b> For men with mCRPC and no pathogenic alterations of HRR, would you offer PARPi + ARPi? |          |          |
|---------------------------------------------------------------------------------------------------|----------|----------|
| <b>Answer</b>                                                                                     | <b>#</b> | <b>%</b> |
| Yes                                                                                               | 10       | 27       |
| No                                                                                                | 16       | 43       |
| Not sure                                                                                          | 9        | 24       |
| Abstain                                                                                           | 2        | 5        |

| <b>8.10</b> Which PARPi ARPi combinations would you consider offering today if it were FDA approved? Select all that apply |          |          |
|----------------------------------------------------------------------------------------------------------------------------|----------|----------|
| <b>Answer</b>                                                                                                              | <b>#</b> | <b>%</b> |
| Olaparib + abiraterone                                                                                                     | 27       | 73       |
| Talazoparib + Enzalutamide                                                                                                 | 21       | 57       |
| Niraparib + Abiraterone                                                                                                    | 10       | 27       |
| Not sure                                                                                                                   | 2        | 5        |
| Abstain                                                                                                                    | 3        | 8        |

| <b>8.11</b> For men with BRCA altered mCRPC, would you offer PARPi + ARPi to men who have progressed on a prior ARPi? |          |          |
|-----------------------------------------------------------------------------------------------------------------------|----------|----------|
| <b>Answer</b>                                                                                                         | <b>#</b> | <b>%</b> |
| Yes                                                                                                                   | 18       | 49       |
| No                                                                                                                    | 13       | 35       |
| Not sure                                                                                                              | 4        | 11       |
| Abstain                                                                                                               | 2        | 5        |

| <b>8.12</b> Setting aside regulatory decisions about approval of PARPi ARPi combinations, will you recommend a combinations that improves rPFS but falls short of statistical significance for improving OS? |          |          |
|--------------------------------------------------------------------------------------------------------------------------------------------------------------------------------------------------------------|----------|----------|
| <b>Answer</b>                                                                                                                                                                                                | <b>#</b> | <b>%</b> |
| Yes                                                                                                                                                                                                          | 23       | 62       |
| No                                                                                                                                                                                                           | 6        | 16       |
| Not sure                                                                                                                                                                                                     | 5        | 14       |
| Abstain                                                                                                                                                                                                      | 3        | 8        |

| <b>8.13</b> Should carboplatin be presented to patients with HRRm disease as a less-expensive alternative to PARPi? |          |          |
|---------------------------------------------------------------------------------------------------------------------|----------|----------|
| <b>Answer</b>                                                                                                       | <b>#</b> | <b>%</b> |
| Yes                                                                                                                 | 13       | 35       |
| No                                                                                                                  | 6        | 16       |
| Not sure                                                                                                            | 2        | 5        |
| Only for those who cannot afford a PARPi or who are ineligible for a PARPi                                          | 12       | 32       |
| Abstain                                                                                                             | 4        | 11       |

| <b>8.14</b> If initial NGS testing of the primary tumor reveals no deleterious alterations in HRR genes, do you recommend repeating NGS when the disease progresses to mCRPC? |          |          |
|-------------------------------------------------------------------------------------------------------------------------------------------------------------------------------|----------|----------|
| <b>Answer</b>                                                                                                                                                                 | <b>#</b> | <b>%</b> |
| Yes                                                                                                                                                                           | 30       | 81       |
| No                                                                                                                                                                            | 4        | 11       |
| Not sure                                                                                                                                                                      | 1        | 3        |
| Abstain                                                                                                                                                                       | 2        | 5        |

| <b>8.15</b> Assuming a patient was eligible for PARP inhibitor and radium 223, how would you sequence the two? |          |          |
|----------------------------------------------------------------------------------------------------------------|----------|----------|
| <b>Answer</b>                                                                                                  | <b>#</b> | <b>%</b> |
| PARP before radium 223                                                                                         | 21       | 57       |
| PARP after radium 223                                                                                          | 2        | 5        |
| PARP in combination with radium 223                                                                            | 3        | 8        |
| It depends (open ended response)                                                                               | 9        | 24       |
| Abstain                                                                                                        | 2        | 5        |

## 9. mCRPC—Theranostics

| <b>9.1</b> What are the minimum requirements for PSMA PET in patient selection for 177Lu-PSMA-radioligand therapy (RLT) in the VISION population?                                      |          |          |
|----------------------------------------------------------------------------------------------------------------------------------------------------------------------------------------|----------|----------|
| <b>Answer</b>                                                                                                                                                                          | <b>#</b> | <b>%</b> |
| No PSMA PET imaging is necessary for patient selection in postchemo population with limited options                                                                                    | 0        | 0        |
| Any PSMA uptake > background in any lesion                                                                                                                                             | 3        | 8        |
| PSMA SUV mean > 10                                                                                                                                                                     | 2        | 6        |
| PSMA > liver in some active lesions (but a minority can be PSMA low/negative)                                                                                                          | 7        | 19       |
| VISION study protocol ( $\geq 1$ PSMA-positive metastatic lesion [PSMA > liver parenchyma in $\geq 1$ metastatic lesion of any size in any organ system] and no PSMA-negative lesions) | 16       | 44       |
| TheraP study protocol ( $\geq 1$ site with SUV max $\geq 20$ , no FDG+/PSMA-                                                                                                           | 2        | 6        |
| PSMA SUV mean > 10                                                                                                                                                                     |          |          |
| Not sure                                                                                                                                                                               | 4        | 11       |
| Abstain                                                                                                                                                                                | 2        | 6        |



| 9.2 Does it matter which PSMA PET agent is utilized? |    |    |
|------------------------------------------------------|----|----|
| Answer                                               | #  | %  |
| Yes                                                  | 0  | 0  |
| No                                                   | 34 | 94 |
| Abstain                                              | 2  | 6  |

| 9.3 Should both PSMA and FDG PET be used in patient selection for 177Lu-PSMA-RLT? |    |    |
|-----------------------------------------------------------------------------------|----|----|
| Answer                                                                            | #  | %  |
| Yes                                                                               | 5  | 14 |
| No                                                                                | 21 | 58 |
| Not sure                                                                          | 9  | 25 |
| Abstain                                                                           | 1  | 3  |

| 9.4 Should most patients being treated in the VISION setting receive combination therapy with ARPI? |    |    |
|-----------------------------------------------------------------------------------------------------|----|----|
| Answer                                                                                              | #  | %  |
| Yes                                                                                                 | 11 | 31 |
| No                                                                                                  | 11 | 31 |
| Not sure                                                                                            | 13 | 36 |
| Abstain                                                                                             | 1  | 3  |

| 9.5 Should patients who have PSMA positive mCRPC who are naïve to chemotherapy receive 177Lu-PSMA-RLT? |    |    |
|--------------------------------------------------------------------------------------------------------|----|----|
| Answer                                                                                                 | #  | %  |
| Yes                                                                                                    | 1  | 3  |
| Yes, if they are unfit for chemo                                                                       | 7  | 19 |
| Yes, if they have balanced discussion and refuse chemo                                                 | 2  | 6  |
| Not until full data for randomized trials are released                                                 | 17 | 47 |
| Not until guidelines are stated are in favor                                                           | 1  | 3  |
| Not until FDA approval                                                                                 | 5  | 14 |
| Never                                                                                                  | 0  | 0  |
| Only on trial                                                                                          | 1  | 3  |
| Not sure                                                                                               | 0  | 0  |
| Abstain                                                                                                | 2  | 6  |

| 9.6 What is the minimum pretreatment hemoglobin level used in patient selection for 177Lu-PSMA-RLT? |    |    |
|-----------------------------------------------------------------------------------------------------|----|----|
| Answer                                                                                              | #  | %  |
| 10 g/dL                                                                                             | 3  | 8  |
| 9 g/dL                                                                                              | 7  | 19 |
| 8 g/dL                                                                                              | 13 | 36 |
| 7 g/dL                                                                                              | 1  | 3  |
| Doesn't matter if due to marrow infiltration                                                        | 5  | 14 |
| Not sure                                                                                            | 6  | 17 |
| Abstain                                                                                             | 1  | 3  |

| 9.7 What is the minimum pretreatment platelet count used in patient selection for 177Lu-PSMA-RLT? |    |    |
|---------------------------------------------------------------------------------------------------|----|----|
| Answer                                                                                            | #  | %  |
| 100 x 10 <sup>9</sup> /L                                                                          | 9  | 25 |
| 75 x 10 <sup>9</sup> /L                                                                           | 12 | 33 |
| 50 x 10 <sup>9</sup> /L                                                                           | 5  | 14 |
| 25 x 10 <sup>9</sup> /L                                                                           | 0  | 0  |
| Doesn't matter if due to marrow infiltration                                                      | 3  | 8  |
| Not sure                                                                                          | 6  | 17 |
| Abstain                                                                                           | 1  | 3  |

| 9.8 What is the minimum pretreatment neutrophil count used in patient selection for 177Lu-PSMA-RLT? |    |    |
|-----------------------------------------------------------------------------------------------------|----|----|
| Answer                                                                                              | #  | %  |
| 1.5 x 10 <sup>9</sup> /L                                                                            | 12 | 33 |
| 1 x 10 <sup>9</sup> /L                                                                              | 10 | 28 |
| Doesn't matter if due to marrow infiltration                                                        | 4  | 11 |
| Not sure                                                                                            | 8  | 22 |
| Abstain                                                                                             | 2  | 6  |

| 9.9 What is the maximum pretreatment serum creatinine used in patient selection for 177Lu-PSMA-RLT? |    |    |
|-----------------------------------------------------------------------------------------------------|----|----|
| Answer                                                                                              | #  | %  |
| Upper limit of normal (ULN)                                                                         | 0  | 0  |
| 1.5 x ULN                                                                                           | 18 | 50 |
| 2.5 x ULN                                                                                           | 3  | 8  |
| 3 x ULN                                                                                             | 0  | 0  |
| Doesn't matter as long as other parameters are OK                                                   | 2  | 6  |
| Not sure                                                                                            | 11 | 31 |
| Abstain                                                                                             | 2  | 6  |

| 9.10 Should anyone receive less than 7.4 GBq (200 mCi) of 177Lu-PSMA-617 in cycle 1 (ie, should there be initial "dose" reductions)? |    |    |
|--------------------------------------------------------------------------------------------------------------------------------------|----|----|
| Answer                                                                                                                               | #  | %  |
| Yes                                                                                                                                  | 4  | 11 |
| No                                                                                                                                   | 16 | 44 |
| Not sure                                                                                                                             | 14 | 39 |
| Abstain                                                                                                                              | 2  | 6  |

| 9.11 Should we calculate normal organ dose limits with prior lifetime radiation exposure prior to dosing with therapeutic radionuclide therapy? |    |    |
|-------------------------------------------------------------------------------------------------------------------------------------------------|----|----|
| Answer                                                                                                                                          | #  | %  |
| Yes, I would not treat even if organ function was adequate                                                                                      | 1  | 3  |
| Yes, I would adjust radioactivity dose even if organ function was adequate                                                                      | 9  | 25 |
| No, I would ignore prior exposure as long as organ function was adequate                                                                        | 13 | 36 |
| Not sure                                                                                                                                        | 9  | 25 |
| Abstain                                                                                                                                         | 4  | 11 |

| <b>9.12</b> Should most patients undergo regular postinfusion SPECT after each treatment with standard of care 177Lu-PSMA-RLT? |          |          |
|--------------------------------------------------------------------------------------------------------------------------------|----------|----------|
| <b>Answer</b>                                                                                                                  | <b>#</b> | <b>%</b> |
| Yes, with most or all doses                                                                                                    | 8        | 22       |
| Yes, at least once per course                                                                                                  | 6        | 17       |
| No, only for research                                                                                                          | 14       | 39       |
| Not sure                                                                                                                       | 7        | 19       |
| Abstain                                                                                                                        | 1        | 3        |

| <b>9.13</b> Should patients have serial PSMA PET during treatment with standard of care 177Lu-PSMA-RLT? |          |          |
|---------------------------------------------------------------------------------------------------------|----------|----------|
| <b>Answer</b>                                                                                           | <b>#</b> | <b>%</b> |
| Yes, PSMA PET is standard imaging to assess response/progression                                        | 5        | 14       |
| Yes, most patients should have at least 1 follow-up PSMA PET                                            | 14       | 39       |
| No, only for research                                                                                   | 14       | 39       |
| Not sure                                                                                                | 2        | 6        |
| Abstain                                                                                                 | 1        | 3        |

| <b>9.14</b> Should patients with excellent response (>95% PSA reduction, no symptoms of disease, favorable imaging) stop therapy early (less than planned treatment course outside of a study) with planned restart of treatment upon progression? |          |          |
|----------------------------------------------------------------------------------------------------------------------------------------------------------------------------------------------------------------------------------------------------|----------|----------|
| <b>Answer</b>                                                                                                                                                                                                                                      | <b>#</b> | <b>%</b> |
| Yes, with up to 1 consolidation cycle                                                                                                                                                                                                              | 6        | 17       |
| Yes, only if excellent response is accompanied by PSMA low/negative imaging                                                                                                                                                                        | 13       | 36       |
| No, in the absence of toxicity, patients should complete their treatment course                                                                                                                                                                    | 12       | 33       |
| Not sure                                                                                                                                                                                                                                           | 3        | 8        |
| Abstain                                                                                                                                                                                                                                            | 2        | 6        |

| <b>9.15</b> In your opinion, after clinical trials have been completed, what will be the optimal disease state for 177Lu-PSMA-RLT? |          |          |
|------------------------------------------------------------------------------------------------------------------------------------|----------|----------|
| <b>Answer</b>                                                                                                                      | <b>#</b> | <b>%</b> |
| Postchemo mCRPC                                                                                                                    | 3        | 8        |
| Prechemo mCRPC                                                                                                                     | 20       | 56       |
| Overtly (conventional imaging) metastatic noncastrate PC                                                                           | 6        | 17       |
| Biochemically recurrent PSMA PET plus PC                                                                                           | 1        | 3        |
| High-risk nonmetastatic PC in combination with local therapy                                                                       | 2        | 6        |
| Not sure                                                                                                                           | 3        | 8        |
| Abstain                                                                                                                            | 1        | 3        |

| <b>9.16</b> Do you believe that targeted alpha particles will be better than beta particles? |          |          |
|----------------------------------------------------------------------------------------------|----------|----------|
| <b>Answer</b>                                                                                | <b>#</b> | <b>%</b> |
| Yes                                                                                          | 5        | 14       |
| Yes for efficacy, but I worry about toxicity                                                 | 17       | 47       |

|                                                                            |   |    |
|----------------------------------------------------------------------------|---|----|
| Yes for safety, but I worry about efficacy in the setting of bulky disease | 4 | 11 |
| No, overall therapeutic index of betas will prove more acceptable          | 0 | 0  |
| No                                                                         | 0 | 0  |
| Not sure                                                                   | 9 | 25 |
| Abstain                                                                    | 1 | 3  |

| <b>9.17 Should we use PROs instead of CTCAE to assess nonlaboratory toxicity?</b> |          |          |
|-----------------------------------------------------------------------------------|----------|----------|
| <b>Answer</b>                                                                     | <b>#</b> | <b>%</b> |
| Yes                                                                               | 6        | 17       |
| Yes, for subjective items such as dry mouth                                       | 13       | 36       |
| No, not until there is a validated instrument                                     | 9        | 25       |
| No                                                                                | 1        | 3        |
| Not sure                                                                          | 5        | 14       |
| Abstain                                                                           | 2        | 6        |
| Yes                                                                               | 6        | 17       |
